# Supplementary material for: I understand you feel that way, but I feel this way: the benefits of I-language and communicating perspective during conflict
Source: PeerJ. 2018 May 18;6:e4831. doi: 10.7717/peerj.4831 (PMC5961625; doi:10.7717/peerj.4831)
Supplement: Supplemental Information 3 — Raw data in Excel, variable descriptions in second tab in the file. [file peerj-06-4831-s003.xlsx]

## Sheet: DATA
GENDER	AGE	S1_1	S1_2	S1_3	S1_4	S1_5	S1_6	S1_7	S1_8	S2_1	S2_2	S2_3	S2_4	S2_5	S2_6	S2_7	S2_8	S3_1	S3_2	S3_3	S3_4	S3_5	S3_6	S3_7	S3_8	S4_1	S4_2	S4_3	S4_4	S4_5	S4_6	S4_7	S4_8	S5_1	S5_2	S5_3	S5_4	S5_5	S5_6	S5_7	S5_8	S6_1	S6_2	S6_3	S6_4	S6_5	S6_6	S6_7	S6_8
2	34	3	5	4	4	4	6	6	5	4	5	5	6	4	6	5	6	3	5	4	6	3	5	6	6	3	5	5	6	3	5	6	6	3	3	4	5	1	4	4	6	3	5	5	6	3	4	6	6
2	24	3	2	4	3	4	3	5	5	3	4	4	5	4	4	5	6	3	3	4	3	4	4	5	5	2	3	3	4	3	4	4	5	2	5	3	2	2	4	3	4	3	4	4	4	3	3	5	6
2	19	4	4	3	2	4	6	4	4	3	3	4	3	2	4	5	5	3	3	3	4	3	4	4	5	3	4	4	4	4	5	5	5	4	2	3	4	3	3	5	4	3	4	5	4	4	5	6	5
1	45	1	1	1	1	2	3	2	2	3	2	5	5	3	4	5	5	2	3	3	5	3	4	5	5	3	3	4	4	3	4	5	5	1	3	2	2	2	1	4	4	3	3	3	3	4	3	5	5
1	34	2	4	4	4	3	5	5	5	2	4	4	5	4	5	5	6	2	4	4	5	3	4	5	6	2	3	5	6	4	5	6	6	1	4	3	4	2	4	5	5	2	2	3	5	4	4	5	6
2	26	4	4	4	5	4	5	6	5	4	5	4	6	4	5	4	6	3	4	4	6	4	5	5	6	3	4	6	6	4	4	5	6	3	4	4	4	4	4	5	6	4	4	5	6	4	5	6	6
2	48	4	4	5	4	4	4	6	5	3	3	3	5	3	3	4	4	4	3	3	4	3	3	5	5	4	4	4	4	3	4	4	4	3	4	4	4	3	4	5	4	4	4	5	5	4	4	5	5
2	24	3	2	3	2	4	3	5	4	2	3	4	4	5	5	6	6	2	3	5	6	4	5	6	6	3	4	5	4	5	6	6	6	2	4	3	3	2	5	6	6	2	2	2	4	3	3	6	6
2	40	3	4	3	4	3	4	5	5	5	4	5	5	4	4	5	5	4	5	5	4	5	4	5	5	4	4	5	5	5	5	5	5	4	4	3	4	4	3	4	4	4	4	5	5	4	5	5	5
1	27	4	4	3	3	5	5	4	4	3	4	4	5	3	5	4	4	3	4	4	5	3	6	4	4	3	3	4	4	3	4	5	5	2	3	3	3	3	4	4	5	3	3	4	5	4	4	6	6
2	32	1	2	3	3	2	2	4	4	2	3	3	4	3	4	3	5	3	4	3	4	3	4	5	5	4	4	3	5	4	4	4	5	2	3	4	3	3	4	4	5	3	4	3	5	4	5	5	6
2	45	6	6	2	4	5	6	3	2	4	6	5	6	3	5	3	4	2	4	4	6	3	3	2	4	2	2	3	5	3	4	4	5	6	6	1	2	6	6	3	4	2	4	5	4	2	4	5	5
2	46	2	2	4	4	2	3	5	5	2	3	3	5	2	4	5	5	4	3	3	4	2	4	5	5	3	2	5	4	4	2	5	5	3	2	4	4	3	4	4	5	3	4	5	5	3	3	5	5
2	20	4	4	3	2	4	5	4	5	2	4	2	4	3	4	5	4	3	4	3	5	4	5	2	4	5	5	4	4	5	4	2	4	3	3	3	4	3	4	2	5	4	4	4	4	5	4	5	5
2	23	3	3	4	4	3	5	5	4	3	3	3	5	4	5	5	5	3	3	3	4	3	5	4	5	4	3	4	4	3	4	5	5	2	2	3	3	3	4	3	4	4	3	4	4	4	5	6	6
2	25	2	2	4	3	4	4	6	6	2	2	5	4	3	4	6	6	1	2	2	3	4	5	6	6	2	3	4	4	4	4	6	4	1	2	3	4	2	3	6	5	2	3	4	5	3	3	6	6
2	56	3	5	4	4	4	5	5	5	4	5	5	6	4	5	5	6	5	4	4	6	3	5	6	6	2	3	2	5	3	2	4	3	2	3	3	3	4	4	5	5	4	3	5	5	4	4	6	6
2	27	4	4	4	3	4	4	4	4	3	4	5	5	4	4	5	5	4	4	5	5	4	4	5	5	4	4	5	5	4	5	5	5	3	3	4	4	3	3	4	4	4	4	5	5	4	4	5	5
2	19	5	5	2	4	4	2	1	2	6	3	4	4	3	3	4	4	4	4	4	4	3	2	2	1	3	5	2	2	3	3	2	1	4	5	4	4	5	5	3	2	4	5	4	5	5	5	3	4
2	26	3	3	3	4	3	4	5	4	3	4	4	5	3	4	4	4	3	4	3	4	3	4	4	5	3	4	4	5	4	4	4	5	2	4	4	4	3	4	5	5	3	4	4	4	4	4	5	5
2	22	3	3	3	3	3	4	4	5	3	3	4	4	3	5	5	5	3	3	3	4	4	4	5	5	3	3	3	4	3	3	4	5	3	3	3	3	3	4	5	5	3	3	3	4	3	3	5	4
2	41	5	4	5	5	5	4	6	6	4	4	4	5	4	4	4	5	4	4	4	5	5	5	5	6	5	5	5	6	5	6	6	6	5	4	4	4	5	5	6	6	5	5	5	5	5	5	6	6
2	45	4	4	3	3	4	5	5	6	3	4	6	5	3	4	4	5	3	4	3	3	5	5	6	5	3	3	5	6	4	5	6	6	3	3	3	3	5	5	5	5	3	3	5	6	2	3	6	6
2	53	3	4	5	4	4	5	6	4	3	4	3	4	4	5	3	5	2	4	4	5	3	5	5	6	3	3	4	4	3	3	5	5	3	4	4	4	2	3	5	4	4	3	4	5	4	4	5	5
2	24	3	3	3	3	3	3	3	3	2	2	2	2	2	2	2	2	3	3	3	3	3	3	3	3	2	2	2	2	2	2	2	2	2	2	2	2	2	2	2	2	3	3	3	3	3	3	3	3
2	35	4	4	2	3	4	4	5	4	2	3	3	4	3	4	4	4	2	4	3	4	2	4	4	4	4	4	4	4	3	5	5	4	2	2	3	4	2	4	4	4	3	3	3	4	2	4	5	5
2	32	1	3	4	5	3	3	5	5	2	5	2	5	3	5	5	6	1	4	3	6	2	5	5	6	2	4	4	5	3	4	5	6	1	4	3	5	2	4	4	6	3	6	5	6	3	5	5	6
2	27	4	5	4	4	4	5	5	5	5	4	5	5	5	5	5	5	4	5	5	5	4	5	5	5	3	3	4	4	4	4	4	5	3	4	3	4	3	4	4	3	3	4	4	4	4	5	4	5
2	23	3	3	3	3	4	5	6	6	2	4	3	5	3	5	5	6	3	3	4	5	3	5	6	6	1	2	2	3	2	2	4	4	3	3	2	2	3	4	4	3	3	3	4	4	2	4	5	6
1	24	3	3	4	4	4	4	5	5	2	3	3	4	4	5	5	5	3	3	4	4	4	4	5	5	3	3	5	4	4	4	5	6	2	3	4	5	3	3	4	5	3	4	3	5	3	4	5	6
2	36	2	3	3	3	4	4	4	4	2	3	3	4	2	3	3	4	2	4	3	4	2	4	3	4	2	3	3	4	2	3	3	3	1	3	3	3	1	3	3	4	3	4	3	4	3	3	5	5
2	21	4	4	2	3	4	6	2	3	4	4	2	5	4	3	4	5	3	4	3	5	4	4	4	4	4	5	4	4	3	4	3	4	3	2	3	4	3	4	4	4	5	5	5	5	5	4	6	5
2	39	3	4	3	2	5	6	4	4	2	4	3	4	4	5	5	5	3	2	4	4	3	5	4	5	4	4	5	5	4	5	5	6	1	4	3	4	2	5	6	4	4	4	5	6	4	5	6	6
2	20	3	3	4	4	3	3	5	5	2	3	4	4	4	4	5	5	2	3	4	3	4	4	5	4	4	4	4	4	4	5	5	5	2	2	3	3	3	2	4	4	3	2	3	3	3	4	4	4
2	26	6	4	5	3	4	4	3	3	6	5	4	3	5	3	4	2	4	3	1	2	6	3	2	1	6	5	3	4	5	4	4	2	5	4	4	3	5	2	3	3	1	3	2	2	5	4	3	3
2	36	2	4	3	3	3	5	5	5	2	4	3	6	3	4	4	5	2	4	3	5	4	4	5	6	3	5	4	5	4	5	5	6	1	2	3	3	3	4	4	5	3	3	4	5	3	5	5	5
2		3	2	2	2	2	4	4	4	2	3	2	3	2	4	4	5	1	3	3	4	2	3	3	4	2	3	4	4	3	3	2	4	1	2	2	2	2	2	4	4	2	4	4	5	3	4	5	6
2	28	3	3	3	4	3	4	4	4	3	4	3	3	3	3	4	4	3	4	3	4	3	4	3	4	3	4	4	4	3	4	4	4	2	2	3	3	2	2	3	3	3	3	5	3	3	3	5	5
1		3	4	4	5	4	3	5	5	4	4	3	4	4	4	3	3	5	5	6	5	3	4	3	4	2	3	2	3	2	3	4	4	5	3	2	2	4	3	4	4	3	4	6	6	4	5	4	5
2	20	2	5	5	3	3	5	5	6	1	2	3	4	4	3	6	5	1	5	3	4	2	5	5	6	2	3	2	5	4	4	4	6	1	3	3	5	2	2	4	5	3	3	4	5	3	5	6	6
2	25	3	4	4	4	4	4	5	5	4	4	4	5	4	4	4	5	4	4	3	4	4	4	5	5	3	4	4	5	3	4	5	5	3	2	3	3	4	4	4	4	4	4	5	4	4	4	5	5
2	40	2	2	2	3	2	3	4	4	3	4	4	5	4	5	5	4	2	4	3	3	2	3	4	5	3	3	3	4	3	4	5	4	2	2	2	2	2	1	4	4	2	4	3	5	2	4	5	5
2	33	3	3	3	3	3	4	5	3	2	2	4	5	3	4	5	5	1	2	3	3	5	4	4	4	4	6	5	6	4	5	6	6	1	3	5	5	3	4	6	6	4	4	5	5	4	5	6	6
2	21	4	3	5	5	4	6	6	6	4	4	6	5	6	6	6	6	3	4	4	6	6	6	6	6	3	4	4	4	5	5	5	6	4	4	5	5	5	5	6	6	4	6	6	6	6	6	6	6
2	29	4	5	4	3	2	5	3	2	3	5	4	5	4	5	6	6	3	4	4	6	3	4	6	6	4	6	4	5	4	6	4	5	2	4	3	5	3	5	4	6	3	4	4	5	4	5	5	6
2	42	2	3	4	3	3	1	5	4	3	4	4	5	3	4	5	5	2	4	2	4	4	3	5	5	2	4	3	5	3	3	5	5	2	3	3	4	3	2	4	4	3	3	4	6	4	4	6	6
2	35	3	3	3	4	4	4	5	5	2	3	4	4	3	4	4	4	4	3	4	4	3	3	4	4	3	3	3	3	3	4	4	4	3	3	3	3	3	4	4	4	3	3	4	4	3	3	4	4
2	22	4	5	5	4	4	5	6	6	5	5	5	6	5	6	6	6	4	4	5	5	5	5	6	6	5	5	4	6	4	5	6	6	4	4	5	5	4	5	6	6	5	5	6	6	5	5	6	6
2	42	3	3	4	3	3	4	4	4	3	4	4	5	4	4	4	5	3	4	5	5	4	5	4	5	4	3	4	4	4	4	5	5	3	2	3	4	3	3	4	5	4	5	5	5	4	4	5	6
2	39	1	1	1	1	2	3	3	3	2	2	2	2	1	4	3	3	4	4	5	4	4	4	4	5	3	4	5	5	4	4	5	4	2	2	3	2	3	3	4	3	5	5	6	5	5	5	5	6
2	26	3	3	4	4	3	3	4	4	3	4	3	4	3	4	4	4	3	3	3	4	3	4	4	4	3	4	3	4	3	4	4	4	3	3	3	3	3	3	3	4	3	4	4	4	3	3	4	4
2	24	3	3	3	4	4	4	5	4	3	3	3	3	3	4	4	4	3	4	5	4	3	3	5	5	3	3	4	4	3	4	5	5	3	3	3	3	3	3	4	4	4	4	4	4	4	5	5	5
1	30	1	2	2	3	2	3	4	4	1	2	1	3	2	3	3	3	1	2	2	3	2	3	4	4	1	2	3	3	1	2	4	4	1	3	3	3	1	3	4	3	1	3	4	4	2	4	4	4
2	20	3	4	4	4	4	6	5	5	1	3	3	4	3	4	5	6	2	3	3	4	3	5	5	6	3	4	5	5	4	5	6	6	1	4	2	3	3	5	5	6	2	3	5	5	3	4	5	6
2	21	4	5	3	3	4	6	4	6	2	5	5	6	4	5	5	6	3	3	4	4	3	4	5	5	3	5	4	6	3	6	5	6	2	5	3	4	2	3	5	5	3	3	3	4	4	5	6	6
2	19	4	4	3	3	3	4	4	5	4	3	4	4	3	4	5	5	3	3	3	4	3	3	4	5	3	4	3	4	3	4	5	5	2	3	2	3	2	3	4	4	3	2	4	4	3	4	4	5
1	42	4	4	5	6	3	5	5	6	5	4	5	6	4	3	5	6	2	3	6	6	4	4	6	6	3	3	4	5	4	4	5	4	1	2	2	3	2	2	4	6	2	4	5	5	3	4	5	6
2	26	3	3	4	4	4	4	5	5	2	3	3	4	3	3	4	4	2	3	3	4	3	4	3	4	3	4	5	5	3	5	5	5	1	3	1	4	1	2	4	4	2	4	3	5	3	4	6	5
1	42	2	3	4	4	3	3	4	4	3	3	5	5	4	4	5	5	2	3	4	4	3	5	5	5	3	4	4	5	4	4	5	5	2	3	4	4	3	3	4	5	2	3	4	4	3	4	5	5
2	39	3	4	4	4	3	5	5	5	3	4	4	5	4	5	5	5	4	5	5	5	4	4	5	6	3	4	4	5	4	5	5	5	3	4	3	4	3	5	5	5	3	4	5	5	4	4	5	5
2	41	2	3	4	2	3	3	5	5	2	4	4	5	3	5	5	6	2	3	4	4	4	3	6	6	2	3	4	5	4	4	4	5	2	3	4	3	2	4	5	5	3	3	4	6	3	2	5	5
2	19	1	3	2	4	4	3	5	5	4	3	2	5	5	5	5	5	2	2	3	4	3	4	5	6	4	4	5	4	4	5	6	6	2	3	4	4	3	3	5	5	3	4	5	4	3	4	5	6
1	22	3	3	3	4	3	3	3	4	2	3	4	2	4	4	3	3	4	5	4	4	3	4	2	3	2	2	5	2	4	4	3	4	2	3	4	4	3	3	4	4	4	6	4	1	3	3	3	4
2	34	2	2	2	2	2	2	2	2	4	4	4	4	4	4	4	4	3	3	4	4	3	4	4	5	3	2	4	4	4	4	5	4	2	3	4	3	3	3	5	5	3	4	4	5	3	4	5	5
2	41	4	4	4	3	4	4	3	3	4	4	4	4	3	3	4	4	4	4	4	4	3	3	3	4	4	4	4	4	3	4	4	4	3	2	3	2	3	2	3	3	4	5	5	4	4	4	5	4
2	23	6	3	4	5	5	3	5	5	5	5	4	3	4	2	2	1	6	3	5	5	6	4	2	2	4	4	2	1	4	3	1	1	5	6	3	4	4	4	2	2	5	5	4	4	4	3	2	1
2	30	4	4	5	5	2	6	6	6	2	3	5	5	3	4	4	6	2	5	5	6	3	6	6	6	5	6	4	4	5	5	4	4	2	2	5	5	2	3	6	6	4	4	6	5	4	5	6	6
1	25	1	3	2	1	2	2	6	5	3	4	4	4	4	3	5	6	2	4	2	4	2	3	5	5	2	6	3	2	3	4	5	4	5	5	5	5	6	5	5	6	2	4	5	5	3	5	6	5
2	44	3	4	3	4	4	4	4	4	3	4	4	4	3	4	4	4	3	4	4	4	3	4	4	4	3	4	4	4	3	4	4	4	3	4	4	4	3	4	4	4	3	4	4	4	3	4	4	4
2	20	3	5	2	4	2	3	2	2	2	4	2	5	2	4	4	5	2	2	2	4	2	3	4	5	2	2	4	4	2	3	4	5	2	2	4	2	4	3	3	4	2	4	4	4	3	4	5	5
2	21	3	5	3	3	3	4	4	3	4	4	5	5	3	4	4	5	3	3	4	4	4	3	4	5	3	4	4	4	3	4	4	5	3	3	3	4	3	4	4	5	4	4	5	5	4	4	4	4
2	39	3	2	3	3	1	3	2	2	2	3	2	3	2	3	3	2	1	3	2	3	2	3	2	3	3	4	3	4	2	4	4	4	2	4	3	3	3	3	3	3	3	4	4	5	3	5	5	5
2	33	4	4	4	4	4	6	4	5	4	4	5	5	4	5	4	5	3	4	4	5	4	4	5	5	4	5	6	5	4	5	5	6	5	2	4	3	4	4	5	5	4	4	5	5	4	4	6	5
2	36	3	4	3	3	4	6	5	5	4	6	3	5	5	5	6	6	3	5	3	5	3	5	5	5	3	4	5	6	5	4	6	5	3	4	4	4	4	4	5	6	3	4	6	6	5	5	6	6
2	35	3	5	4	4	3	5	6	6	3	4	4	3	2	5	6	6	3	3	4	4	2	5	6	6	2	3	5	5	2	3	4	6	2	5	3	4	3	5	5	6	2	3	4	5	2	6	5	6
2	23	4	4	4	4	4	4	5	5	3	5	5	4	4	4	4	4	4	3	4	4	4	3	5	4	2	3	2	3	2	3	4	5	2	2	2	2	2	2	3	4	3	4	5	5	3	4	5	5
2	20	3	3	3	3	3	4	4	4	4	4	4	4	4	3	4	4	3	3	3	3	3	3	4	4	5	5	5	5	5	5	4	4	4	5	5	4	3	5	4	4	5	5	5	5	5	5	4	5
2	24	4	5	5	4	4	4	5	5	5	5	5	6	5	5	6	5	5	5	5	5	5	6	5	5	5	5	6	6	6	5	6	6	4	5	4	4	5	5	6	5	5	5	6	6	6	6	6	6
2	23	1	1	4	5	1	4	5	5	3	6	4	6	3	4	5	6	1	2	4	5	3	4	5	6	1	5	3	6	3	3	4	5	2	4	2	3	5	5	3	4	1	2	5	6	3	4	5	6
2	25	4	5	5	5	3	4	6	4	4	3	2	6	3	5	3	5	3	5	4	6	3	6	5	6	3	5	4	5	5	5	6	6	3	4	4	3	3	6	4	5	4	6	6	5	4	6	5	5
2	21	2	3	4	4	3	4	6	5	2	3	4	5	4	5	5	5	2	4	2	4	3	3	5	6	1	2	3	3	1	3	5	6	1	4	3	3	2	4	5	6	3	3	5	4	3	3	6	4
2	36	2	3	3	4	3	3	4	4	3	4	3	5	3	4	4	4	3	4	4	4	4	4	4	4	3	2	3	3	3	3	4	4	2	3	2	2	2	4	3	4	4	4	3	4	3	4	6	4
2	21	3	6	5	5	5	6	5	6	3	4	4	5	4	5	4	5	3	3	4	4	4	4	4	4	4	4	4	4	4	4	6	6	3	4	3	3	3	4	4	4	3	3	4	4	3	4	4	4
2	33	4	5	5	5	4	4	4	4	5	6	6	6	5	6	6	6	5	6	6	6	5	5	5	6	6	6	6	6	6	6	6	6	3	3	3	4	3	3	5	5	5	6	5	6	5	5	6	6
2	52	2	2	3	1	3	1	3	2	3	3	4	4	3	3	4	4	2	3	3	3	3	3	4	4	4	4	4	4	4	4	5	5	1	2	3	3	2	3	3	3	4	4	5	5	4	4	5	5
1	24	1	2	4	3	4	4	5	6	2	3	5	5	3	4	5	5	2	2	3	3	2	4	5	5	2	4	4	4	4	4	5	6	1	1	3	4	3	2	4	5	3	3	5	5	5	5	5	5
2	40	5	3	4	4	3	2	3	2	6	6	5	4	5	3	3	2	6	4	3	3	5	3	2	1	5	2	2	2	2	3	2	2	6	6	5	5	6	5	3	3	5	4	4	3	6	3	2	1
2	32	2	2	5	5	2	3	6	5	3	3	4	6	2	3	5	6	2	3	5	5	2	5	5	6	2	4	5	5	2	4	5	6	2	5	4	5	2	4	5	6	1	4	4	5	2	3	5	5
2	49	3	5	1	2	4	5	2	2	3	4	3	4	4	4	4	5	3	4	3	4	2	4	5	4	3	3	5	4	4	5	5	5	2	3	2	3	3	4	5	4	3	4	5	5	3	3	4	5
2	30	3	4	3	3	2	3	1	1	4	2	2	3	3	1	1	1	4	3	3	1	3	3	2	1	4	3	3	2	3	1	2	1	4	3	3	2	3	3	2	1	4	3	2	1	3	1	2	2
2	28	5	4	3	4	5	5	4	4	2	3	4	3	3	4	3	4	2	3	3	4	4	4	4	4	4	4	4	5	4	5	5	4	3	4	3	3	4	4	3	4	4	4	4	4	3	3	4	3
2	26	4	4	4	4	5	5	5	5	2	5	4	5	4	5	5	5	3	4	4	5	3	3	4	5	4	5	3	5	3	5	4	5	3	5	4	5	4	4	5	5	4	3	5	5	4	5	6	6
2	24	2	3	4	3	3	5	5	5	3	3	4	6	4	5	5	6	3	2	4	5	4	4	5	6	3	4	4	6	3	3	5	5	1	3	4	5	3	3	6	6	4	5	6	6	4	4	5	6
2	19	2	3	3	3	2	4	4	4	3	4	4	4	3	3	5	5	2	4	2	3	2	3	4	4	3	4	4	4	2	3	3	3	2	3	3	4	2	3	4	2	3	4	4	5	4	3	4	4
2	20	3	2	4	4	3	5	5	5	2	4	3	4	3	5	6	5	2	3	3	4	4	5	6	6	2	3	4	6	2	4	5	6	1	1	2	3	3	5	5	6	2	3	4	4	3	4	5	6
2	21	3	3	1	2	6	6	4	5	2	3	1	3	3	4	5	6	2	4	4	4	2	5	6	6	3	4	6	5	4	5	5	6	3	2	3	5	2	6	5	6	4	5	3	6	4	5	6	6
2	28	4	3	3	3	5	6	4	4	3	4	3	5	4	6	4	5	2	3	4	4	3	4	5	5	3	3	4	3	3	4	6	5	4	4	4	4	3	4	4	4	3	4	4	4	4	4	4	4
2	19	2	3	3	3	2	4	4	5	2	4	3	4	3	4	4	4	2	3	4	4	3	4	3	4	2	3	3	4	3	4	4	4	2	4	3	4	3	5	4	4	2	4	4	4	3	4	4	5
1	29	2	3	4	4	3	3	4	4	3	3	3	4	4	4	4	4	2	3	4	4	3	4	4	5	4	4	5	5	4	5	5	5	2	3	3	3	3	4	4	4	4	4	5	5	3	4	5	5
2	41	4	4	4	3	3	4	3	3	2	3	3	4	3	4	4	5	2	3	3	4	2	3	4	5	2	2	4	3	2	3	4	4	1	4	3	4	2	4	4	5	2	4	4	4	2	3	5	4
2	20	4	3	4	3	4	3	3	3	5	4	4	3	4	4	4	4	5	4	5	5	5	4	3	3	5	4	3	4	4	4	3	2	6	5	5	4	5	4	3	3	5	2	3	3	3	2	4	3
2	20	2	5	5	3	3	3	4	4	4	5	5	6	5	5	5	5	4	4	4	5	5	4	4	4	6	4	4	4	5	5	4	4	3	2	4	4	2	3	3	3	5	5	4	5	3	3	3	4
2	22	3	3	4	4	3	5	5	5	2	3	5	5	3	4	4	5	2	4	2	4	3	3	4	5	3	4	5	4	3	4	4	5	2	2	3	3	2	3	3	4	3	5	2	3	4	3	5	5
2	46	5	6	5	1	5	6	4	3	4	4	3	5	3	6	4	5	3	4	4	5	3	4	4	4	4	3	3	4	4	4	4	4	5	5	3	4	4	4	3	4	5	4	3	3	4	3	5	4
2	35	4	3	5	5	4	4	5	4	3	4	4	4	4	5	5	5	3	4	3	5	3	4	5	5	3	4	4	4	4	4	5	5	3	4	3	3	4	4	4	4	4	5	4	4	4	4	5	5
2	21	2	3	4	5	3	5	5	4	2	3	4	5	4	5	5	6	2	3	4	4	3	4	5	5	5	4	3	4	4	5	3	3	2	3	2	2	4	3	5	6	4	4	5	5	4	2	6	5
2	20	1	2	3	3	2	2	3	3	2	4	4	4	3	4	4	5	2	4	3	5	3	4	5	5	2	4	3	4	3	3	5	5	1	1	2	2	2	3	3	4	2	3	4	5	3	4	5	4
1	19	4	2	3	4	5	6	3	3	3	5	6	4	4	4	5	5	4	3	5	3	3	3	2	4	2	3	4	4	3	2	3	4	3	3	4	5	2	5	4	2	4	3	3	3	5	4	5	4
2	29	3	3	4	4	3	4	5	5	3	3	3	4	3	3	4	4	3	3	4	4	3	4	5	4	3	4	4	4	3	4	4	4	2	3	4	4	3	4	4	4	3	3	4	4	3	4	4	5
2	20	2	4	4	4	3	6	4	4	3	4	2	5	3	5	3	4	1	5	2	5	2	5	4	6	1	4	3	5	3	5	4	5	1	5	3	4	1	4	3	4	1	4	4	6	1	4	5	6
2	40	2	3	4	3	5	3	6	6	1	3	2	5	3	6	3	3	2	5	3	5	2	4	4	6	3	4	3	4	2	5	6	5	1	3	2	5	3	5	5	6	6	3	3	6	4	4	6	6
1	31	2	2	2	4	2	2	5	3	4	3	4	4	4	5	5	5	3	4	4	4	3	5	5	5	3	4	4	4	4	5	3	4	2	2	3	3	2	3	4	5	2	3	5	5	3	5	5	6
2	40	1	2	1	2	2	3	5	5	3	2	3	3	2	3	4	5	1	2	2	3	2	3	5	5	1	1	3	2	2	2	5	5	1	1	2	2	2	3	5	5	1	1	2	3	2	2	4	5
2	21	2	4	4	5	2	4	6	5	2	4	4	5	3	3	4	6	4	4	5	4	2	2	5	6	1	3	4	5	2	4	6	6	1	3	2	3	3	4	5	5	2	5	5	6	2	2	6	6
1	24	3	4	4	3	5	5	6	6	2	4	3	4	3	5	5	4	2	3	4	4	3	5	5	6	1	2	2	4	3	4	4	5	3	4	4	4	2	3	5	6	1	2	3	5	3	3	5	6
2	25	4	4	5	5	4	5	6	5	3	4	5	6	4	5	6	6	3	4	4	5	3	4	5	6	4	5	4	5	4	5	5	5	2	3	4	5	3	4	5	6	3	6	4	6	5	4	5	6
2	26	2	2	3	4	4	4	4	5	3	3	5	4	3	4	4	5	1	3	3	3	4	4	5	5	4	2	5	5	4	3	4	5	3	2	4	3	3	3	5	4	3	4	6	5	2	3	5	6
2	19	3	4	2	3	4	5	3	4	3	3	4	4	3	4	4	4	3	3	3	4	3	4	4	5	3	3	4	5	3	5	5	5	3	3	3	3	3	4	4	4	3	3	4	4	3	3	4	5
2	22	4	1	6	5	2	1	4	4	6	6	6	5	5	3	4	4	1	1	3	3	3	5	3	5	1	4	5	5	1	6	6	6	1	1	1	1	1	6	5	1	1	4	3	1	1	2	4	6
2	37	4	6	4	3	4	2	6	4	4	5	5	5	3	6	5	6	3	4	5	5	3	5	5	5	3	3	4	5	3	4	6	5	3	3	4	5	3	5	5	5	3	3	4	5	3	3	6	5
2	23	3	4	4	4	3	4	5	5	4	4	5	6	5	5	5	6	4	4	5	5	4	5	5	6	4	4	5	5	4	4	5	5	2	3	2	3	2	3	4	4	3	4	5	5	4	3	5	4
2	58	4	4	4	5	4	4	5	5	4	5	4	5	4	5	5	5	3	4	4	4	3	4	4	4	3	4	4	4	3	4	5	5	3	4	4	3	3	4	4	4	5	5	5	5	4	4	5	5
1	22	4	3	4	4	4	5	5	6	2	3	3	4	3	4	3	5	3	4	3	4	4	3	5	5	3	4	4	5	4	4	5	6	2	2	3	4	3	4	4	4	2	2	5	5	3	4	6	6
2	24	4	4	3	3	4	5	4	4	2	4	2	4	3	4	2	3	2	5	2	4	2	5	3	5	2	4	5	5	2	4	4	5	2	5	4	5	3	4	4	5	3	4	4	5	3	5	4	5
2	25	2	2	3	4	2	3	4	4	6	6	5	6	4	5	5	5	5	6	6	6	5	5	5	5	1	2	1	2	1	1	2	2	2	4	2	2	4	5	3	3	4	4	5	5	4	4	6	6
2	29	3	3	5	5	4	5	4	5	3	3	4	5	4	4	5	4	3	4	4	5	4	5	5	5	4	4	3	5	3	4	5	5	3	3	3	3	3	4	4	3	4	4	4	4	4	5	5	5
1	31	3	3	3	4	4	5	5	5	3	3	4	4	3	4	4	4	4	4	4	5	4	5	4	5	3	4	3	5	3	4	4	5	2	3	4	3	3	4	4	4	4	3	5	5	4	4	5	5
2	44	2	4	3	3	3	5	4	4	3	4	4	5	4	4	4	5	3	3	3	4	4	3	5	5	2	4	4	4	3	5	5	6	2	1	3	4	3	4	5	6	4	5	4	6	4	4	5	6
2	22	3	4	4	3	3	4	5	5	3	3	4	4	3	4	4	5	2	4	3	4	3	4	5	5	3	4	3	4	3	4	5	4	2	3	3	3	2	4	4	4	3	3	4	4	3	4	5	5
2	37	3	5	4	4	3	5	4	3	3	4	3	5	3	4	4	5	3	4	4	5	4	4	4	5	3	5	4	6	4	5	5	6	2	3	3	4	3	4	5	5	4	5	5	5	4	5	5	6
2	19	1	3	2	3	4	4	3	3	1	2	1	2	2	3	3	3	2	1	2	2	2	2	2	3	4	4	4	4	4	4	4	4	2	4	3	3	2	3	3	3	4	4	4	4	4	4	5	4
2	24	6	3	5	3	4	1	1	1	2	6	3	5	3	6	6	6	3	5	4	6	3	5	6	6	2	2	6	4	4	3	4	3	1	2	3	4	3	3	6	6	3	5	6	3	3	5	4	5
2	30	4	5	2	3	3	4	3	3	3	2	3	3	2	5	4	4	3	4	3	4	3	4	3	5	2	3	2	4	3	2	3	3	1	1	1	1	1	3	2	3	4	5	4	5	5	5	6	6
2	20	2	4	3	4	3	4	5	4	2	4	4	5	3	4	4	5	2	3	4	4	4	5	6	5	2	3	4	5	2	4	5	5	1	3	3	3	1	3	4	4	3	4	6	5	3	3	6	5
2	23	2	3	4	2	2	4	3	4	2	3	3	3	3	4	5	5	2	4	2	3	3	4	5	4	3	4	4	5	3	4	4	5	2	2	2	4	3	4	4	5	2	3	4	4	3	3	5	5
2	25	3	5	2	3	3	5	3	2	2	5	2	4	1	2	3	4	3	5	4	4	1	2	2	5	2	3	3	5	3	2	4	3	5	3	5	1	3	1	2	3	1	2	4	6	3	3	4	5
2	43	2	5	4	3	2	5	4	5	3	5	4	5	3	5	4	5	3	4	5	5	3	4	5	5	2	4	5	5	3	5	4	5	2	4	3	4	3	4	3	6	4	5	5	6	3	4	6	5
2	26	3	3	3	3	4	5	5	4	2	4	4	5	3	4	5	6	3	4	5	6	5	4	6	6	3	3	6	5	4	4	6	5	4	1	2	2	3	3	4	6	6	4	4	4	3	5	6	5
2	47	2	3	2	3	4	5	5	5	3	3	2	3	5	5	5	6	2	3	3	4	4	5	5	5	4	4	5	6	5	5	6	6	3	3	4	3	4	3	5	6	3	4	5	5	4	5	6	5
2	25	2	3	2	3	4	5	5	4	2	3	2	4	2	5	4	5	4	3	4	4	4	5	5	5	4	4	4	5	5	5	4	5	3	3	3	3	3	3	4	5	3	3	4	3	4	4	5	5
1	35	4	4	5	3	5	4	3	2	2	2	5	5	2	3	2	2	4	4	5	2	3	4	3	2	4	4	2	2	4	4	3	4	5	5	2	2	5	5	2	2	2	4	4	3	2	5	5	5
1	19	2	2	5	4	3	3	6	5	2	2	3	3	3	3	5	6	2	3	3	3	2	3	5	6	2	2	3	4	3	3	4	5	1	2	2	3	3	3	5	5	2	1	4	4	2	3	6	6
2	36	4	4	2	2	4	5	2	2	4	4	4	5	4	3	3	5	3	4	4	4	3	3	4	4	5	5	5	5	5	5	6	6	5	6	4	3	4	6	5	6	4	4	5	5	4	5	4	5
1	39	5	4	5	6	6	6	6	6	5	5	5	6	5	5	6	6	5	5	5	5	5	6	6	6	4	4	4	5	5	5	6	5	3	3	4	4	3	4	6	6	3	4	5	5	5	4	6	6
1	19	3	2	2	4	2	3	5	4	2	2	4	3	3	4	5	5	2	3	4	4	3	3	5	5	2	3	3	3	4	4	5	5	2	2	3	3	2	3	5	5	2	2	3	4	3	3	3	5
2	24	3	3	5	5	4	3	6	4	1	2	1	3	3	3	3	4	1	3	3	4	2	4	4	5	3	4	3	5	2	4	4	5	1	4	2	2	2	2	3	2	2	4	4	4	3	4	5	5
1	25	3	3	3	3	2	3	4	4	2	2	3	4	2	3	3	2	3	2	3	4	3	4	3	5	3	4	3	5	3	4	4	4	2	3	3	3	2	4	4	4	3	5	4	4	4	3	4	5
2	20	3	4	4	4	3	4	5	5	4	5	5	6	4	5	5	6	4	3	5	5	4	5	6	6	4	3	5	5	4	4	6	5	3	3	4	4	4	5	5	6	4	4	6	6	4	5	6	6
2	20	4	3	5	4	4	4	5	4	3	2	3	4	4	4	3	3	2	3	3	3	3	3	3	4	2	4	4	4	3	4	5	5	3	4	2	5	3	4	4	5	3	3	4	5	3	3	5	4
1	19	3	2	4	3	3	4	5	5	3	3	4	4	3	4	4	5	3	4	3	4	3	4	4	4	3	2	3	3	2	4	4	4	3	3	4	4	2	3	5	4	2	3	3	3	4	5	5	5
2	31	4	5	5	4	6	4	6	4	3	5	2	4	3	4	4	3	4	5	4	5	5	5	6	6	5	5	4	5	5	5	4	6	4	4	3	3	4	5	4	5	3	4	5	4	4	5	6	5
2	30	2	3	4	4	3	4	4	4	4	4	4	5	4	5	5	6	3	4	4	5	4	4	4	5	4	4	4	4	5	6	5	5	1	2	3	3	1	3	4	4	2	2	5	5	4	3	6	6
2	20	3	4	3	4	5	6	6	6	1	3	2	2	4	4	6	5	1	3	2	5	3	3	5	6	1	5	5	4	1	4	5	5	1	3	2	2	2	6	3	5	1	1	4	4	2	2	3	3
2	20	4	3	4	5	4	3	2	3	4	3	4	3	5	3	3	3	5	5	5	5	4	4	3	3	5	5	4	5	5	5	3	3	5	5	5	4	5	2	3	2	4	5	5	5	4	4	2	2
2	39	2	4	4	5	4	5	4	3	2	5	4	4	3	5	5	4	2	4	3	4	2	4	4	5	5	5	4	5	3	5	6	6	2	2	3	4	2	3	4	4	2	4	4	5	2	5	5	5
2	21	2	4	3	2	2	4	3	4	1	5	2	3	2	5	5	5	2	5	2	2	2	4	4	5	2	4	3	3	3	5	4	5	1	3	3	2	1	4	3	5	2	4	3	4	2	4	4	5
2	20	2	3	5	5	3	4	6	6	2	3	5	4	4	4	5	6	1	3	4	5	4	4	5	6	4	5	3	6	5	5	6	6	1	4	3	5	3	3	6	6	1	4	4	4	3	5	5	6
1	23	3	3	3	2	4	4	3	4	2	2	3	5	3	4	4	4	2	3	3	3	3	5	5	5	3	3	5	4	4	4	5	5	2	3	3	3	3	3	5	5	2	3	4	4	4	4	5	6
1	20	3	3	2	3	5	5	3	2	2	2	1	2	1	3	2	4	4	5	5	5	5	6	5	5	5	5	2	3	3	2	3	3	1	1	1	1	1	1	1	2	6	6	6	5	6	5	6	6
2	22	4	4	4	4	5	5	5	5	2	5	4	4	4	5	3	3	2	3	2	4	3	5	4	5	4	4	4	3	4	4	2	2	2	3	3	3	3	3	2	3	3	4	5	4	3	4	4	4
2	23	5	6	4	5	4	4	4	4	4	3	4	4	4	6	4	4	4	6	5	6	6	6	6	6	6	6	6	6	6	6	6	6	4	4	4	4	4	4	4	4	5	5	5	6	5	6	5	6
2	25	2	3	2	2	4	3	2	3	3	4	4	4	3	3	4	4	3	3	3	5	3	4	4	4	2	3	4	4	4	4	5	4	2	4	1	4	3	4	4	4	5	5	5	6	3	4	4	5
2	20	6	6	4	4	5	1	2	2	6	5	3	4	6	6	6	2	6	5	4	2	6	6	3	1	5	4	1	5	6	3	1	1	6	5	4	4	5	3	5	1	5	5	2	1	6	5	1	1
2	29	3	3	4	2	4	2	3	6	2	6	2	4	2	6	5	6	2	2	3	2	2	2	5	6	1	1	2	2	2	2	3	4	2	2	1	3	1	2	4	5	2	2	3	3	2	3	6	6
2	30	1	1	2	2	2	2	6	5	2	2	1	3	3	4	5	5	1	2	3	3	1	5	6	5	2	2	4	5	3	4	5	6	1	4	2	5	3	6	6	6	3	5	6	6	4	5	6	6
2	36	1	2	2	3	3	4	4	5	4	4	3	4	3	4	5	5	2	4	3	3	2	4	4	5	3	2	4	4	3	5	5	5	2	3	3	4	3	3	5	5	2	2	5	4	3	3	5	5
2	20	4	5	5	4	4	5	5	6	2	3	3	3	3	4	3	4	3	3	2	3	4	5	5	5	5	4	4	5	5	5	4	5	1	2	3	3	2	4	4	4	4	4	5	5	4	4	5	6
1	43	4	5	5	5	5	5	6	6	3	3	4	4	3	4	5	5	3	4	3	4	3	4	5	5	3	4	5	4	3	4	5	5	2	3	2	3	4	4	4	5	3	4	5	5	3	3	6	5
1	41	3	4	3	3	2	3	4	5	4	4	4	4	3	3	3	4	4	4	4	5	3	3	3	3	3	3	4	3	4	3	4	4	3	2	3	3	2	2	4	3	3	4	3	4	3	3	4	4
1	20	3	3	3	3	4	2	5	2	3	2	3	4	4	2	3	5	4	6	4	4	5	2	5	2	4	5	2	4	2	5	3	5	4	3	5	4	2	2	3	5	4	2	3	3	5	3	5	5
2	34	5	5	4	4	4	4	3	3	4	5	4	4	5	5	4	5	3	4	4	4	4	4	5	5	4	4	3	4	4	5	5	5	3	4	3	4	3	3	5	5	5	5	5	5	5	5	6	6
1	40	2	1	3	4	3	3	5	4	3	6	5	4	3	4	4	4	2	4	3	5	3	5	4	5	1	2	2	4	4	5	3	6	1	4	5	4	2	3	6	5	3	4	5	6	4	4	5	6
2	26	3	3	4	5	4	4	5	5	4	4	4	5	3	4	5	5	2	3	4	4	4	4	5	5	4	5	5	5	4	5	5	5	1	2	3	4	2	4	5	5	3	3	5	4	3	4	5	5
1	30	2	2	3	3	2	3	4	4	3	4	4	4	3	3	4	4	3	3	4	4	3	3	4	4	3	3	4	4	3	3	4	4	2	2	3	3	2	3	4	4	3	4	4	5	4	3	5	5
2	20	3	5	4	4	4	6	5	4	3	4	3	4	3	4	4	4	3	4	4	5	3	3	4	4	4	4	4	4	4	6	5	5	3	2	4	4	3	3	4	4	4	5	6	6	5	5	5	6
2	20	4	4	3	3	5	5	3	4	4	4	4	4	3	5	4	4	3	3	4	4	3	4	4	4	4	3	3	4	5	4	4	4	2	5	3	3	3	5	4	4	3	3	4	4	3	4	5	5
1	25	4	5	2	4	4	3	5	5	4	5	5	4	3	4	6	4	3	4	5	5	3	4	3	5	5	3	4	4	5	5	4	3	3	3	3	3	3	5	4	4	6	4	5	6	5	4	6	5
2	23	4	5	4	4	6	6	6	5	3	3	4	4	4	4	4	5	3	4	5	5	4	5	6	4	4	5	5	5	4	5	5	5	2	4	2	4	3	4	4	3	4	5	3	4	4	4	5	5
2	33	4	5	4	4	4	4	4	4	4	4	4	4	4	4	4	4	4	4	4	4	4	4	4	4	4	4	4	4	4	4	4	4	3	4	4	4	3	4	4	4	4	4	4	4	4	4	4	4
2	29	3	3	4	5	4	4	4	5	3	4	4	4	2	4	3	5	2	3	5	5	4	4	5	5	3	3	4	4	3	3	3	4	3	3	3	4	2	3	4	4	1	3	3	3	3	2	4	4
1	24	4	3	3	3	4	4	5	4	3	4	3	4	2	4	5	4	4	3	3	5	4	3	5	5	2	3	4	5	4	4	5	5	2	3	4	4	3	3	5	5	2	2	4	4	3	4	5	5
2	36	3	3	4	4	5	5	5	5	4	4	5	5	3	4	6	6	3	4	4	4	3	4	5	6	3	4	5	5	3	4	5	6	1	2	3	3	3	3	4	5	3	4	4	5	3	5	5	6
2	38	4	4	4	4	4	4	4	4	4	4	4	4	4	4	4	4	4	4	4	4	4	4	4	4	5	5	5	5	5	5	5	5	4	4	4	4	4	4	4	4	5	5	5	5	5	5	5	5
2	19	2	3	4	4	3	4	5	5	4	4	4	5	4	4	5	6	5	4	6	6	3	5	6	6	3	3	4	5	4	4	5	6	2	3	3	3	3	4	5	5	4	4	5	6	3	4	5	6
2	19	2	3	4	3	3	4	5	4	2	4	3	5	2	5	5	5	2	3	3	4	2	4	5	5	2	4	4	4	3	5	5	5	1	2	4	4	2	3	5	5	2	3	3	5	2	4	5	5
2	48	2	4	3	3	3	4	3	5	1	4	2	4	3	4	4	5	1	4	3	4	4	4	4	5	1	4	3	4	2	4	4	5	1	4	4	4	2	4	4	5	2	4	3	4	3	4	5	5
2	22	3	4	4	5	3	5	6	6	3	5	4	4	4	6	5	6	2	4	5	5	3	6	6	6	3	4	4	5	4	4	4	6	2	3	4	5	4	4	5	6	4	4	5	5	4	5	6	6
2	50	1	3	2	2	3	3	4	3	1	2	1	1	1	3	3	3	1	2	1	2	1	2	2	2	2	3	4	4	2	3	3	4	1	2	2	2	1	3	2	3	1	3	2	2	1	3	3	3
2	34	3	3	3	3	4	5	4	5	2	3	5	4	3	5	4	4	3	3	3	4	3	3	4	5	3	4	4	5	3	5	4	6	2	2	4	5	3	4	4	5	5	5	5	5	4	3	5	4
2	34	2	6	4	4	3	6	5	5	1	3	3	6	4	4	5	6	1	3	4	6	2	5	5	6	1	4	3	6	3	5	6	6	1	2	3	5	2	4	5	6	2	3	4	6	4	4	6	6
2	45	3	3	4	5	6	4	2	5	4	6	3	5	3	2	3	4	2	4	3	4	3	5	4	6	3	4	5	6	2	4	3	6	1	4	3	4	1	4	5	6	3	4	5	4	3	4	4	6
2	27	3	3	4	4	3	4	3	3	4	4	4	4	3	4	4	4	4	4	4	4	3	3	3	4	3	4	4	4	4	4	4	4	4	3	3	3	4	3	3	4	4	4	4	4	3	3	4	4
2	22	3	4	3	3	3	3	4	4	3	4	3	4	3	4	4	4	2	3	4	3	3	2	4	4	3	3	5	5	4	3	4	5	2	3	3	3	2	4	4	4	4	4	4	4	3	3	5	5
1	20	5	3	3	3	5	4	3	4	2	3	3	3	4	5	4	5	3	3	3	3	3	3	4	5	3	3	3	5	3	3	5	6	2	2	3	3	3	3	4	5	3	3	4	3	4	4	5	6
1	28	3	2	3	4	3	4	6	3	2	4	3	4	3	5	5	5	3	4	4	5	4	4	5	6	3	5	3	5	3	4	6	6	2	3	5	4	4	4	5	6	5	4	6	6	4	3	6	4
2	23	3	3	4	4	4	5	5	5	3	4	5	5	3	5	6	4	3	4	5	5	4	4	6	6	3	5	4	5	3	4	5	6	3	5	4	5	4	5	6	6	2	4	4	5	3	5	5	6
2	43	4	4	4	4	4	5	5	5	4	4	5	5	4	4	4	4	3	4	3	5	4	4	4	4	4	4	5	5	4	4	5	5	3	3	4	4	4	4	5	5	4	4	5	5	5	5	5	5
2	27	3	4	5	3	5	4	4	6	3	4	3	4	3	4	4	5	2	3	3	3	3	4	5	5	3	3	2	4	4	3	2	4	2	3	3	4	2	5	3	4	4	5	6	4	4	3	5	4
2	23	4	3	2	3	5	4	4	5	3	4	2	4	5	5	5	5	3	3	3	4	4	5	4	5	3	4	5	4	5	3	5	5	2	3	4	2	2	3	4	5	4	5	4	4	3	3	3	4
2	22	3	3	3	4	3	4	4	4	2	4	4	4	5	3	4	5	3	4	4	5	3	4	5	6	3	3	4	4	2	2	5	6	1	2	2	4	3	5	5	6	2	3	5	6	3	4	3	5
1	22	2	2	4	3	4	4	5	5	2	2	3	4	4	4	6	6	3	3	2	4	3	5	5	6	3	3	5	5	4	5	6	6	2	3	3	4	2	3	5	6	3	3	3	3	3	3	3	3
1	22	4	4	4	4	4	5	5	5	4	4	3	5	4	5	5	5	3	3	4	4	4	3	5	5	3	3	5	5	4	3	6	6	3	3	3	4	3	6	4	5	3	4	5	6	3	4	6	6
1	21	4	4	5	3	5	5	3	5	5	4	3	4	4	4	4	5	4	2	3	3	4	3	4	5	6	6	5	6	5	6	5	6	4	3	4	2	1	3	4	5	3	4	4	5	5	6	6	6
2	22	3	5	4	4	4	5	5	4	2	4	6	4	3	3	4	5	3	6	5	5	3	4	5	5	3	3	4	5	3	4	6	6	3	4	4	4	3	4	4	5	3	2	3	3	4	4	5	6
1	22	4	4	4	4	3	3	2	3	2	3	5	4	4	4	4	4	4	4	4	5	3	4	4	5	3	3	4	5	3	4	5	6	3	2	4	4	3	4	5	5	3	3	4	4	4	4	5	5
1	22	4	5	5	4	4	5	5	4	4	5	4	5	4	5	4	6	4	4	4	5	4	5	5	6	4	6	6	6	4	5	6	6	1	2	3	3	3	4	4	5	2	4	5	5	6	5	6	6
1	23	2	4	4	3	3	4	4	5	2	4	3	4	3	4	5	4	2	3	2	3	3	4	5	4	5	3	3	3	4	5	4	4	2	2	3	4	3	3	4	5	3	3	4	5	4	4	5	5
1	22	1	2	2	2	3	4	3	4	3	4	4	4	3	4	4	5	3	4	4	4	3	4	4	5	2	3	3	4	3	3	4	4	2	3	3	3	2	4	3	4	3	3	4	4	4	4	3	5
2	25	4	5	3	2	4	5	4	4	2	4	3	6	3	4	4	5	3	2	2	6	3	3	5	5	2	3	4	6	4	4	5	6	1	2	3	4	1	3	3	4	2	5	4	6	2	5	5	6
2	21	4	4	5	5	2	4	4	3	5	6	6	6	5	5	5	5	4	5	4	6	5	4	5	6	3	4	5	4	4	4	5	5	4	6	4	5	3	4	4	5	2	3	4	6	4	5	4	5
2	22	3	5	4	5	3	5	5	5	3	4	3	4	5	5	5	4	3	3	3	3	3	5	6	5	3	3	3	3	3	3	5	5	2	3	3	3	4	5	6	5	1	5	3	5	4	3	5	5
2	24	2	1	3	2	3	5	5	4	2	4	3	4	4	5	5	6	1	2	2	4	3	4	4	5	2	4	3	4	3	3	5	6	1	3	4	3	2	3	4	5	1	4	4	5	3	3	4	5
2	21	4	4	4	3	3	6	5	5	3	3	2	4	2	3	4	4	2	4	4	4	4	5	4	5	2	3	3	3	3	4	4	5	3	4	4	3	4	4	5	5	4	4	5	5	4	5	5	5
1	22	3	4	4	4	3	4	4	5	4	4	4	5	4	5	5	5	3	4	3	4	3	4	4	5	4	5	5	5	5	6	6	6	3	3	3	4	3	3	4	4	4	6	6	6	4	5	6	6
2	27	2	2	3	3	3	3	4	4	3	3	4	4	4	3	5	4	3	3	4	3	4	4	5	5	4	4	4	4	5	5	5	5	2	3	4	3	3	3	4	4	3	4	5	5	4	4	6	6
2	22	4	4	3	3	4	4	4	4	4	4	4	4	3	4	4	3	3	3	3	3	3	3	3	4	3	3	4	4	4	4	3	3	4	4	4	4	3	4	4	4	3	4	4	4	4	4	3	4
2	22	3	5	4	5	3	5	5	4	2	4	4	5	2	3	3	3	2	5	4	5	3	3	4	3	2	4	3	3	4	5	3	5	2	4	3	3	2	4	4	4	2	4	5	5	2	4	4	5
2	22	3	3	4	4	3	5	6	5	4	4	4	6	4	5	6	6	3	4	5	4	4	5	6	6	3	3	4	5	4	4	6	6	3	4	4	4	4	4	5	5	3	3	4	4	4	4	5	5
1	21	4	4	4	4	4	4	6	6	4	4	4	6	4	6	6	4	4	4	4	4	4	4	6	6	4	4	4	4	4	4	6	6	3	2	3	1	3	3	5	4	4	4	4	4	4	6	6	6
2	22	4	5	4	5	4	4	5	4	4	4	4	5	3	4	4	4	3	4	4	4	4	3	4	5	4	5	4	4	3	4	4	6	3	4	3	3	4	5	4	5	4	5	4	4	4	4	6	6
1	22	1	2	2	3	4	3	4	4	3	5	4	5	4	5	4	5	2	4	3	5	3	5	4	6	1	3	3	5	3	4	5	5	1	3	3	2	3	3	4	5	4	5	5	6	5	5	5	6
1	21	2	2	3	3	3	3	4	4	2	3	3	3	3	4	4	4	2	3	3	4	3	3	4	4	4	4	4	5	4	4	5	5	2	2	3	4	3	2	4	4	2	2	4	4	3	3	5	5
1	25	4	3	4	2	4	5	5	5	3	4	4	4	3	4	4	5	3	4	4	5	3	4	5	4	4	4	4	4	4	4	5	5	2	4	3	3	3	5	4	5	4	4	5	5	3	4	5	5
1	22	3	3	3	4	3	5	4	5	3	4	4	4	4	4	4	5	4	3	3	4	3	4	4	4	4	4	3	4	4	3	4	5	3	4	4	4	3	3	5	5	4	4	5	4	4	4	4	5
2	22	2	4	4	3	4	4	4	5	1	3	3	4	2	3	4	4	2	3	3	3	2	3	5	4	2	2	3	4	2	3	4	4	1	2	2	3	2	3	4	4	2	3	4	4	2	3	5	5
2	24	3	4	6	3	4	4	5	5	2	5	4	4	4	5	3	6	2	4	3	5	3	5	4	6	2	6	4	5	3	5	5	6	2	4	3	4	2	6	4	5	3	4	4	6	3	6	4	5
2	49	4	5	3	2	4	6	4	4	3	2	3	3	4	3	5	6	1	1	2	5	4	2	4	5	2	4	4	6	4	4	5	5	2	3	4	4	2	4	5	5	2	4	5	4	4	5	5	6
1	25	2	4	4	2	3	5	5	4	2	3	4	5	3	4	5	5	2	3	4	5	3	4	5	5	3	4	4	5	4	4	5	5	3	4	2	4	3	3	4	5	2	3	3	4	3	5	5	5
1	22	3	3	3	3	4	4	6	5	2	2	2	3	3	3	5	5	2	3	3	4	3	4	5	5	2	3	4	4	3	3	5	5	2	3	3	4	4	5	5	5	4	2	4	5	3	3	5	6
2	22	2	3	3	3	3	5	4	5	3	4	3	4	4	4	4	5	2	4	2	4	4	4	5	4	3	4	3	4	3	4	4	5	2	5	4	4	3	5	5	5	2	5	4	5	4	4	5	5
2	21	1	2	3	2	2	3	5	5	2	3	4	4	3	4	4	6	1	4	2	3	3	4	4	6	2	3	4	4	2	5	5	6	2	3	3	4	2	4	6	5	3	4	3	5	3	4	4	6
2	22	3	3	4	4	4	5	5	5	2	3	3	5	3	5	4	5	2	3	3	5	4	4	5	5	2	3	3	5	2	4	5	4	1	4	3	4	2	4	4	5	2	3	3	4	3	3	5	6
1	21	1	2	3	2	2	3	2	3	2	3	3	3	2	3	3	3	2	3	3	4	2	3	3	3	3	3	4	4	4	4	4	4	2	3	2	3	4	4	4	4	3	3	4	5	4	4	5	4
2	22	2	5	3	3	4	5	6	5	1	4	3	5	3	5	4	6	1	3	4	4	2	3	5	6	2	4	4	6	2	5	6	6	1	3	4	5	4	4	6	5	2	4	4	6	4	5	5	6
2	22	2	3	4	3	3	6	5	3	3	4	3	4	3	4	3	5	1	3	3	3	3	4	4	6	3	4	6	6	2	4	6	6	1	1	2	4	3	3	4	5	3	3	5	6	3	5	6	5
2	22	3	2	3	4	3	4	4	4	4	3	5	4	3	4	4	2	3	3	4	4	4	4	5	5	5	4	5	5	5	6	6	6	3	4	4	4	4	4	4	5	3	4	6	6	6	6	6	6
1	22	2	2	4	3	4	5	6	6	2	2	3	3	3	5	5	6	1	2	2	3	2	3	5	5	2	3	5	5	3	4	5	6	1	2	2	3	2	2	4	5	1	2	4	5	2	3	5	6
2	22	2	3	3	5	4	3	4	4	2	2	4	3	4	4	5	4	2	2	4	3	3	4	5	4	4	4	4	5	5	3	4	6	1	1	4	4	2	4	5	4	4	4	4	5	3	2	6	6
1	22	3	4	4	4	3	4	5	4	4	4	3	4	3	4	5	4	3	3	3	4	4	4	5	5	4	4	4	4	4	4	5	4	5	3	3	4	4	3	3	4	3	4	3	3	4	4	6	6
2	23	3	4	3	3	5	6	6	6	2	4	3	5	3	5	5	6	2	5	2	5	2	5	5	6	4	4	6	5	4	4	5	5	2	3	2	3	3	4	5	6	3	4	5	6	4	5	6	6
1	25	2	5	4	4	3	5	5	4	2	2	4	5	2	4	4	4	2	4	4	4	3	4	5	5	4	6	2	3	4	4	4	4	2	3	3	4	3	3	4	5	2	4	4	5	4	5	6	6
2	22	3	4	3	3	4	4	4	4	4	3	4	4	3	4	3	4	4	4	3	4	4	4	3	4	4	4	4	4	4	4	4	5	2	2	3	3	3	3	4	4	4	4	4	4	4	4	5	5
2	21	2	3	4	4	2	4	6	5	1	1	1	1	3	3	3	4	1	2	2	2	3	3	4	4	3	4	5	5	4	4	6	6	1	2	3	3	2	3	3	5	2	3	3	4	3	3	6	5
2	26	4	5	4	5	4	5	4	4	4	4	4	4	4	4	3	4	2	3	3	4	3	4	4	4	2	4	5	5	4	4	5	5	2	3	1	2	1	5	2	2	4	6	5	5	4	5	6	6
2	22	2	4	3	3	3	6	4	4	6	5	5	5	4	5	4	5	3	3	3	6	4	4	5	5	3	3	3	5	4	4	4	4	2	2	2	3	3	6	4	5	2	5	3	5	3	5	5	6
1	23	2	3	3	2	4	5	5	5	3	3	3	4	3	3	4	4	4	3	4	4	4	4	5	5	3	3	4	5	3	3	4	5	2	3	2	3	3	4	4	4	3	3	5	4	4	5	6	6
1	23	4	3	3	4	4	4	4	3	3	3	3	3	1	3	6	3	6	6	1	6	6	6	6	1	1	1	1	1	1	1	1	1	3	3	3	3	3	3	3	3	6	6	6	6	6	6	6	6
2	22	5	4	2	3	3	2	1	1	2	3	3	4	3	4	5	6	2	4	3	4	3	4	5	6	1	2	2	4	2	3	5	5	1	3	3	4	3	3	5	5	2	3	4	5	3	4	6	6
2	22	2	3	3	4	3	4	6	6	3	4	3	3	4	4	5	6	2	3	3	5	3	5	5	4	2	3	5	5	4	3	6	5	3	2	5	5	2	2	5	5	3	5	5	5	3	3	5	6
1	26	2	2	4	3	4	5	5	4	1	3	3	5	2	3	5	5	2	4	3	4	3	5	4	5	1	4	4	5	2	3	5	6	1	3	3	4	2	5	4	5	2	5	4	5	3	4	5	6
1	21	3	3	5	4	4	5	6	5	5	5	5	6	4	4	6	5	2	4	4	4	5	4	6	6	2	4	4	4	3	5	6	6	2	3	4	5	3	4	5	5	5	5	6	5	5	6	6	6
2	45	2	2	3	2	3	3	5	4	2	4	3	5	4	4	6	6	2	3	2	5	3	4	6	6	4	4	4	4	4	4	5	5	1	2	3	3	2	2	4	4	3	4	4	4	3	4	5	6
1	23	1	4	3	2	3	6	3	4	2	4	4	4	3	4	4	4	2	2	3	4	3	4	4	4	3	3	4	4	2	5	5	4	2	5	3	4	3	5	4	5	2	4	4	6	3	4	6	5
[truncated: 8 more columns]

## Sheet: VARIABLES
VARIABLE:	LABEL:	VALUES
GENDER	gender	1 = Male, 2 = Female
AGE	age	N/A
S1_1	1. Jerry, I understand that you are not completely well off financially, but I have expenses and could really use what is owed, can I get the boat-money back now?	1 = extremely unlikely, 2 = very unlikely, 3 = somewhat unlikely, 4 = somewhat likely, 5 = very likely, 6 = extremely likely
S1_2	2. Jerry, you are not completely well off financially, but I have expenses and could really use what you owe me, can you pay me the boat-money back now?	1 = extremely unlikely, 2 = very unlikely, 3 = somewhat unlikely, 4 = somewhat likely, 5 = very likely, 6 = extremely likely
S1_3	3. Jerry, I have expenses and could really use what is owed, can I get the boat-money back now?	1 = extremely unlikely, 2 = very unlikely, 3 = somewhat unlikely, 4 = somewhat likely, 5 = very likely, 6 = extremely likely
S1_4	4. Jerry, I have expenses and could really use what you owe me, can you pay me the boat-money back now?	1 = extremely unlikely, 2 = very unlikely, 3 = somewhat unlikely, 4 = somewhat likely, 5 = very likely, 6 = extremely likely
S1_5	5. Jerry, I understand that you are not completely well off financially, but can I get the boat-money back now?	1 = extremely unlikely, 2 = very unlikely, 3 = somewhat unlikely, 4 = somewhat likely, 5 = very likely, 6 = extremely likely
S1_6	6. Jerry, you are not completely well off financially, but can you pay me the boat-money back now?	1 = extremely unlikely, 2 = very unlikely, 3 = somewhat unlikely, 4 = somewhat likely, 5 = very likely, 6 = extremely likely
S1_7	7. Jerry, can I get the boat-money back now?	1 = extremely unlikely, 2 = very unlikely, 3 = somewhat unlikely, 4 = somewhat likely, 5 = very likely, 6 = extremely likely
S1_8	8. Jerry, can you pay me the boat-money back now?	1 = extremely unlikely, 2 = very unlikely, 3 = somewhat unlikely, 4 = somewhat likely, 5 = very likely, 6 = extremely likely
S2_1	1. Wendy, I understand that you are really busy, but I feel it is unfair that I have to do all the work on my own, and I think you should help on the project.	1 = extremely unlikely, 2 = very unlikely, 3 = somewhat unlikely, 4 = somewhat likely, 5 = very likely, 6 = extremely likely
S2_2	2. Wendy, you are really busy, but it is unfair that I have to do all the work on my own, and you should help on the project.	1 = extremely unlikely, 2 = very unlikely, 3 = somewhat unlikely, 4 = somewhat likely, 5 = very likely, 6 = extremely likely
S2_3	3. Wendy, I feel it is unfair that I have to do all the work on my own, and I think you should help on the project.	1 = extremely unlikely, 2 = very unlikely, 3 = somewhat unlikely, 4 = somewhat likely, 5 = very likely, 6 = extremely likely
S2_4	4. Wendy, it is unfair that I have to do all the work on my own, and you should help on the project.	1 = extremely unlikely, 2 = very unlikely, 3 = somewhat unlikely, 4 = somewhat likely, 5 = very likely, 6 = extremely likely
S2_5	5. Wendy, I understand that you are really busy, but I think you should help on the project.	1 = extremely unlikely, 2 = very unlikely, 3 = somewhat unlikely, 4 = somewhat likely, 5 = very likely, 6 = extremely likely
S2_6	6. Wendy, you are really busy, but you should help on the project.	1 = extremely unlikely, 2 = very unlikely, 3 = somewhat unlikely, 4 = somewhat likely, 5 = very likely, 6 = extremely likely
S2_7	7. Wendy, I think you should help on the project.	1 = extremely unlikely, 2 = very unlikely, 3 = somewhat unlikely, 4 = somewhat likely, 5 = very likely, 6 = extremely likely
S2_8	8. Wendy, you should help on the project.	1 = extremely unlikely, 2 = very unlikely, 3 = somewhat unlikely, 4 = somewhat likely, 5 = very likely, 6 = extremely likely
S3_1	1. Lucy, I understand that you are very tired after work, but I feel it is unfair that I have to do all the cleaning by myself, and I think you should help with the cleaning.	1 = extremely unlikely, 2 = very unlikely, 3 = somewhat unlikely, 4 = somewhat likely, 5 = very likely, 6 = extremely likely
S3_2	2. Lucy, you are very tired after work, but it is unfair that I have to do all the cleaning by myself, and you should help with the cleaning.	1 = extremely unlikely, 2 = very unlikely, 3 = somewhat unlikely, 4 = somewhat likely, 5 = very likely, 6 = extremely likely
S3_3	3. Lucy, I feel that it is unfair that I have to do all the cleaning by myself, and I think you should help with the cleaning.	1 = extremely unlikely, 2 = very unlikely, 3 = somewhat unlikely, 4 = somewhat likely, 5 = very likely, 6 = extremely likely
S3_4	4. Lucy, it is unfair that I have to do all the cleaning by myself, and you should help with the cleaning.	1 = extremely unlikely, 2 = very unlikely, 3 = somewhat unlikely, 4 = somewhat likely, 5 = very likely, 6 = extremely likely
S3_5	5. Lucy, I understand that you are very tired after work, but I think you should help with the cleaning.	1 = extremely unlikely, 2 = very unlikely, 3 = somewhat unlikely, 4 = somewhat likely, 5 = very likely, 6 = extremely likely
S3_6	6. Lucy, you are very tired after work, but you should help with the cleaning.	1 = extremely unlikely, 2 = very unlikely, 3 = somewhat unlikely, 4 = somewhat likely, 5 = very likely, 6 = extremely likely
S3_7	7. Lucy, I think you should help with the cleaning.	1 = extremely unlikely, 2 = very unlikely, 3 = somewhat unlikely, 4 = somewhat likely, 5 = very likely, 6 = extremely likely
S3_8	8. Lucy, you should help with the cleaning.	1 = extremely unlikely, 2 = very unlikely, 3 = somewhat unlikely, 4 = somewhat likely, 5 = very likely, 6 = extremely likely
S4_1	1. Jane, I understand that you are hurting after the break up, but I feel that the extra alcohol is doing you no good, and I think the drinking should be slowed up a bit?	1 = extremely unlikely, 2 = very unlikely, 3 = somewhat unlikely, 4 = somewhat likely, 5 = very likely, 6 = extremely likely
S4_2	2. Jane, you are hurting after the break up, but the extra alcohol is doing you no good, and your drinking should be slowed up a bit?	1 = extremely unlikely, 2 = very unlikely, 3 = somewhat unlikely, 4 = somewhat likely, 5 = very likely, 6 = extremely likely
S4_3	3. Jane, I feel that the extra alcohol is doing you no good, and I think the drinking should be slowed up a bit?	1 = extremely unlikely, 2 = very unlikely, 3 = somewhat unlikely, 4 = somewhat likely, 5 = very likely, 6 = extremely likely
S4_4	4. Jane, the extra alcohol is doing you no good, and your drinking should be slowed up a bit?	1 = extremely unlikely, 2 = very unlikely, 3 = somewhat unlikely, 4 = somewhat likely, 5 = very likely, 6 = extremely likely
S4_5	5. Jane, I understand that you are hurting after the break up, but I think the drinking should be slowed up a bit?	1 = extremely unlikely, 2 = very unlikely, 3 = somewhat unlikely, 4 = somewhat likely, 5 = very likely, 6 = extremely likely
S4_6	6. Jane, you are hurting after the break up, but your drinking should be slowed up a bit?	1 = extremely unlikely, 2 = very unlikely, 3 = somewhat unlikely, 4 = somewhat likely, 5 = very likely, 6 = extremely likely
S4_7	7. Jane, I think the drinking should be slowed up a bit?	1 = extremely unlikely, 2 = very unlikely, 3 = somewhat unlikely, 4 = somewhat likely, 5 = very likely, 6 = extremely likely
S4_8	8. Jane, your drinking should be slowed up a bit?	1 = extremely unlikely, 2 = very unlikely, 3 = somewhat unlikely, 4 = somewhat likely, 5 = very likely, 6 = extremely likely
S5_1	1. Brian, I understand that you feel being new means you don’t have a great deal to contribute at the meetings, but I feel it is good for staff morale if we are all present, and I think you should attend staff meetings more regularly.	1 = extremely unlikely, 2 = very unlikely, 3 = somewhat unlikely, 4 = somewhat likely, 5 = very likely, 6 = extremely likely
S5_2	2. Brian, you feel being new means you don’t have a great deal to contribute at the meetings, but it is good for staff morale if we are all present, and you should attend staff meetings more regularly.	1 = extremely unlikely, 2 = very unlikely, 3 = somewhat unlikely, 4 = somewhat likely, 5 = very likely, 6 = extremely likely
S5_3	3. Brian, I feel it is good for staff morale if we are all present, and I think you should attend staff meetings more regularly.	1 = extremely unlikely, 2 = very unlikely, 3 = somewhat unlikely, 4 = somewhat likely, 5 = very likely, 6 = extremely likely
S5_4	4. Brian, it is good for staff morale if we are all present, and you should attend staff meetings more regularly.	1 = extremely unlikely, 2 = very unlikely, 3 = somewhat unlikely, 4 = somewhat likely, 5 = very likely, 6 = extremely likely
S5_5	5. Brian, I understand that you feel being new means you don’t have a great deal to contribute at the meetings, but I think you should attend staff meetings more regularly.	1 = extremely unlikely, 2 = very unlikely, 3 = somewhat unlikely, 4 = somewhat likely, 5 = very likely, 6 = extremely likely
S5_6	6. Brian, you feel being new means you don’t have a great deal to contribute at the meetings, but you should attend staff meetings more regularly.	1 = extremely unlikely, 2 = very unlikely, 3 = somewhat unlikely, 4 = somewhat likely, 5 = very likely, 6 = extremely likely
S5_7	7. Brian, I think you should attend staff meetings more regularly.	1 = extremely unlikely, 2 = very unlikely, 3 = somewhat unlikely, 4 = somewhat likely, 5 = very likely, 6 = extremely likely
S5_8	8. Brian, you should attend staff meetings more regularly.	1 = extremely unlikely, 2 = very unlikely, 3 = somewhat unlikely, 4 = somewhat likely, 5 = very likely, 6 = extremely likely
S6_1	1. Craig, I understand that you have been feeling a lot of pressure at work lately and it is getting to you, but I feel the negativity is starting to bring me down too, so I think you should try to stop being so negative.	1 = extremely unlikely, 2 = very unlikely, 3 = somewhat unlikely, 4 = somewhat likely, 5 = very likely, 6 = extremely likely
S6_2	2. Craig, you have been feeling a lot of pressure at work lately and it is getting to you, but your negativity is starting to bring me down too, so you should try to stop being so negative.	1 = extremely unlikely, 2 = very unlikely, 3 = somewhat unlikely, 4 = somewhat likely, 5 = very likely, 6 = extremely likely
S6_3	3. Craig, I feel the negativity is starting to bring me down too, so I think you should try to stop being so negative.	1 = extremely unlikely, 2 = very unlikely, 3 = somewhat unlikely, 4 = somewhat likely, 5 = very likely, 6 = extremely likely
S6_4	4. Craig, your negativity is starting to bring me down too, so you should try to stop being so negative.	1 = extremely unlikely, 2 = very unlikely, 3 = somewhat unlikely, 4 = somewhat likely, 5 = very likely, 6 = extremely likely
S6_5	5. Craig, I understand that you have been feeling a lot of pressure at work lately and it is getting to you, but I think you should try to stop being so negative.	1 = extremely unlikely, 2 = very unlikely, 3 = somewhat unlikely, 4 = somewhat likely, 5 = very likely, 6 = extremely likely
S6_6	6. Craig, you have been feeling a lot of pressure at work lately and it is getting to you, but you should try to stop being so negative.	1 = extremely unlikely, 2 = very unlikely, 3 = somewhat unlikely, 4 = somewhat likely, 5 = very likely, 6 = extremely likely
S6_7	7. Craig, I think you should try to stop being so negative.	1 = extremely unlikely, 2 = very unlikely, 3 = somewhat unlikely, 4 = somewhat likely, 5 = very likely, 6 = extremely likely
S6_8	8. Craig, you should try to stop being so negative.	1 = extremely unlikely, 2 = very unlikely, 3 = somewhat unlikely, 4 = somewhat likely, 5 = very likely, 6 = extremely likely
SOI	composite: self&other with I lang	n/a
SOY	composite: self&other with you lang	n/a
SI	composite: self only with I lang	n/a
SY	composite: self only with you lang	n/a
OI	composite: other only with I lang	n/a
OY	composite: other only with you lang	n/a
I	composite: no perspective with I lang	n/a
Y	composite: no perspective with you lang	n/a
